# Supplementary material for: Natural Killer T Cells Are Involved in Atherosclerotic Plaque Instability in Apolipoprotein-E Knockout Mice
Source: MDPI journal article supplement (doi:10.3390/ijms222212451), 2021-11-18
Supplement: s1 [file s1]

Figure S1

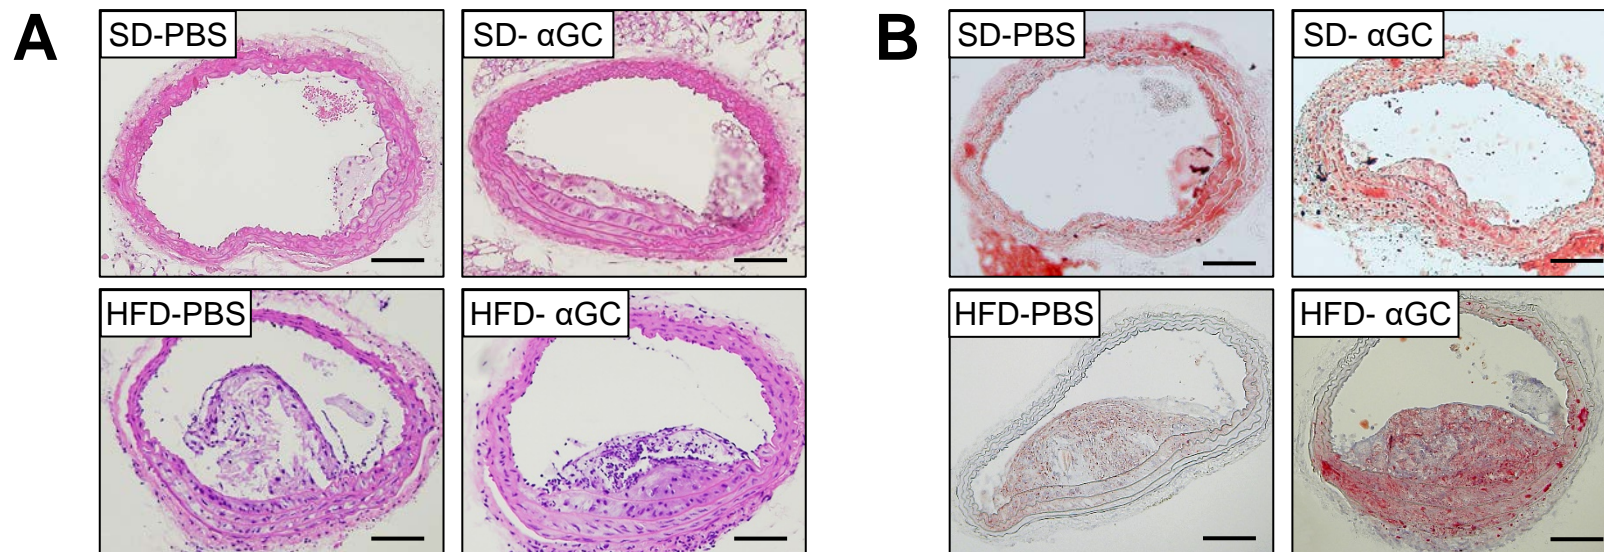

**Figure S1.** Photomicrographs of brachiocephalic artery from 4 groups of SD-PBS (n=6), SD-αGC (n=7), HFD-PBS (n=21), and HFD-αGC (n=21) mice. (A) Representative photomicrographs of Hematoxylin-Eosin staining of cross-sections. (B) Representative photomicrographs of Oil Red-O staining of cross-sections. Scale Bar=100μm.
